## Rh glycoprotein expression is modulated in pufferfish (*Takifugu rubripes*) during high environmental ammonia exposure

C. Michele Nawata<sup>1,\*</sup>, Shigehisa Hirose<sup>2</sup>, Tsutomu Nakada<sup>3</sup>, Chris M. Wood<sup>1</sup> and Akira Kato<sup>2</sup>

<sup>1</sup>Department of Biology, McMaster University, Hamilton, ON, Canada, L8S 4K1 <sup>2</sup>Department of Biological Sciences, Tokyo Institute of Technology, Yokohama, 226-8501, Japan and <sup>3</sup>Department of Molecular Pharmacology, Shinshu University School of Medicine, Matsumoto, 390-8621, Japan

\*Author for correspondence (nawatacm@mcmaster.ca)

Accepted 8 June 2010

### SUMMARY

Rhesus (Rh) protein involvement in ammonia transport processes in freshwater fish has received considerable attention; however, parallel investigations in seawater species are scant. We exposed pufferfish to high environmental ammonia (HEA; 1 and 5 mmol l<sup>-1</sup> NH<sub>4</sub>HCO<sub>3</sub>) and evaluated the patterns of ammonia excretion and gill Rh mRNA and protein expression. Gill H<sup>+</sup>-ATPase, NHE1, NHE2, NHE3, Na<sup>+</sup>/K<sup>+</sup>-ATPase (NKA), Na<sup>+</sup>/K<sup>+</sup>/2Cl<sup>-</sup> co-transporter (NKCC1) mRNA, H<sup>+</sup>-ATPase activity, NKA protein and activity, were also quantified. Activation of NKA by NH<sub>4</sub><sup>+</sup> was demonstrated *in vitro*. The downregulation of *Rhbg* mRNA and simultaneous upregulations of *Rhcg1*, H<sup>+</sup>-ATPase, NHE3, NKA, NKCC1 mRNA, H<sup>+</sup>-ATPase activity, and NKA protein and activity levels suggested that during HEA, ammonia excretion was mediated mainly by mitochondria-rich cells (MRCs) driven by NKA with basolateral NH<sub>4</sub><sup>+</sup> entry *via* NKA and/or NKCC1, and apical NH<sub>3</sub> extrusion *via* Rhcg1. Reprotonation of NH<sub>3</sub> by NHE3 and/or H<sup>+</sup>-ATPase would minimise back flux through the Rh channels. Downregulated *Rhbg* and *Rhag* mRNA observed in the gill during HEA suggests a coordinated protective response to minimise the influx of external ammonia *via* the pavement cells and pillar cells, respectively, while routing ammonia excretion through the MRCs. Exposure to hypercapnia (1% CO<sub>2</sub> in air) resulted in downregulated gill and erythrocyte *Rhag* mRNA. Surprisingly, Rhag, Rhbg, Rhcg1 and Rhcg2 proteins responded to both hypercapnia and HEA with changes in their apparent molecular masses. A dual NH<sub>3</sub>/CO<sub>2</sub> transport function of the pufferfish Rh proteins is therefore suggested. The results support and extend an earlier proposed model of pufferfish gill ammonia excretion that was based on immunolocalisation of the Rh proteins. Passive processes and/or Rhbg and Rhcg2 in the pavement cells may maintain basal levels of plasma ammonia but elevated levels may require active excretion *via* NKA and Rhcg1 in the MRCs.

Key words: fugu, gills, Rhesus proteins, ammonia transport, NHE3, Na<sup>+</sup>/K<sup>+</sup>-ATPase, NKCC1, H<sup>+</sup>-ATPase.

### INTRODUCTION

As the major end product of nitrogen metabolism for many teleost fish, ammonia must be excreted in order to avoid toxic accumulation, and this is accomplished mainly *via* the gills. Ammonia excretion in fish has been studied extensively over the years (for reviews, see Walsh, 1998; Wilkie, 2002; Wood, 1993); however, our understanding of the mechanism(s) involved is far from complete. In freshwater fish, it has been generally believed that the main mode of excretion occurs by diffusion of NH<sub>3</sub> down a favourable gradient across the gill with the subsequent formation of NH<sub>4</sub><sup>+</sup> in an acidified gill boundary layer. In seawater fish, in addition to NH<sub>3</sub> diffusion, NH<sub>4</sub><sup>+</sup> diffusion is thought to occur due to the shallow tight junctions between the mitochondria-rich cells (MRCs) that increase the cation and therefore NH<sub>4</sub><sup>+</sup> permeability (Evans et al., 2005). These views have been modified recently due to the discovery that Rhesus (Rh) genes and proteins are expressed in fish gills (reviewed by Weihrauch et al., 2009; Wright and Wood, 2009).

Based on their sequence similarity to the Mep/Amt family of ammonia transporters, it was originally postulated that the Rh proteins would have a similar function (Marini et al., 1997). Indeed, Marini et al. were able to show that RhAG and RhCG expressed in Mep-deficient yeast mediated the uptake of ammonia as well as the efflux of the ammonium analogue, methylamine (Marini et al., 2000). This was followed by numerous other functional studies that provided evidence for the transport of ammonia or methylamine through

mammalian (reviewed by Javelle et al., 2007) and fish (Nakada et al., 2007; Nawata et al., 2010) Rh proteins expressed in heterologous systems. Very recently, it was demonstrated that purified RhCG reconstituted into liposomes functions as an NH<sub>3</sub> channel (Mouro-Chanteloup et al., 2010). However, because Amt and Rh coexist in a number of organisms (Huang and Ye, 2010) the question has been raised as to why these two proteins would perform the same function. Indeed there is some evidence suggesting that Rh proteins transport CO<sub>2</sub> (Li et al., 2007; Soupene et al., 2002; Soupene et al., 2004) or function as dual CO<sub>2</sub>/NH<sub>3</sub> channels (Endeward et al., 2007).

The first comprehensive study of fish Rh proteins was in the marine pufferfish (*Takifugu rubripes*) where Rhag, Rhbg, Rhcg1 and Rhcg2 were localised to specific regions of cells in the gill epithelium (Nakada et al., 2007). Based entirely on localisation by immunohistochemistry and *in situ* hybridisation, Nakada et al. proposed a preliminary model for gill ammonia excretion (Nakada et al., 2007). Rhag in the pillar cells functioned in cooperation with basolateral Rhbg and apical Rhcg2 in the gill pavement cells (PVCs) to facilitate ammonia efflux out of the gill. Additional support from the MRCs was suggested as an auxiliary route of excretion *via* the basolateral Na<sup>+</sup>/K<sup>+</sup>-ATPase (NKA) and apical Rhcg1. This study was followed by numerous other investigations, which all corroborate the view that Rh proteins are involved in ammonia transport in fish but provide somewhat different models for other species (reviewed by Weihrauch et al., 2009; Wright and Wood, 2009).

Exposure of fish to high environmental ammonia (HEA) initially impairs ammonia excretion but over time the fish are able to re-establish excretion against the unfavourable gradient (Cameron, 1986; Cameron and Heisler, 1983; Claiborne and Evans, 1988; Nawata et al., 2007; Wilson et al., 1994; Zimmer et al., 2010). Recent studies have shown that HEA exposure also triggers an upregulation of Rh mRNA expression in tissues of the mangrove killifish (Hung et al., 2007), adult and juvenile rainbow trout (Nawata et al., 2007; Zimmer et al., 2010), and zebrafish embryos and larvae (Braun et al., 2009). In adult trout exposed to HEA, the upregulation of *Rhbg* and *Rhcg2* mRNA levels in the PVCs coincided with the resumption and enhancement of ammonia excretion (Nawata et al., 2007). Increasing the plasma ammonia levels in trout *via* ammonia infusion, which enhances the ammonia excretion rate, also resulted in upregulations of gill *Rhbg* and *Rhcg2* mRNA (Nawata and Wood, 2009). Similarly, mRNA levels of *Rhbg* and *Rhcg2* were elevated in cultured trout gill cells after pre-exposure to high ammonia (Tsui et al., 2009). Naturally elevated plasma ammonia levels after feeding also increase *Rhcg2* transcript levels in juvenile trout gills (Zimmer et al., 2010). Therefore, at least in the freshwater rainbow trout, it appears that when plasma ammonia levels are elevated, *Rhbg*, *Rhcg2* and PVCs may be key players in ammonia excretion.

While substantial work has been performed on freshwater fish species there is a lack of direct experimental evidence linking the Rh proteins to ammonia excretion in seawater fish. The focus of our study therefore was to use a combined physiological and molecular approach to evaluate the model proposed by Nakada et al. (Nakada et al., 2007) for ammonia excretion across the gills of the pufferfish. We employed HEA as an experimental tool, and measured ammonia flux rates, plasma ammonia concentrations and mRNA expression changes by real-time polymerase chain reaction (PCR) of Rh genes and other potential transporters [ $H^+$ -ATPase (V-type, B-subunit), NHE1, NHE2, NHE3, NKA ( $Na^+/K^+$ -ATPase) ( $\alpha$ -subunit) and NKCC1 ( $Na^+/K^+/2Cl^-$  co-transporter)] in the pufferfish gills, erythrocytes and skin during this HEA challenge.  $H^+$ -ATPase and NKA enzyme activities were measured and the ability of  $NH_4^+$  to activate pufferfish gill NKA was evaluated *in vitro*. Changes in the Rh and NKA proteins were examined by western blotting. Additionally, as Rh proteins could potentially have a dual role as  $NH_3$  and  $CO_2$  channels, pufferfish were exposed to hypercapnic conditions and the Rh mRNA and protein responses in the gill, erythrocytes and skin were analysed.

## MATERIALS AND METHODS

### Experimental animals

Pufferfish [*Takifugu rubripes* (Temminck and Schlegel)] weighing 162–407 g, purchased from the Numazu Aquaculture Cooperative, Shizuoka, Japan, were held in 150 l glass aquaria (5 fish per tank) in artificial seawater (Rohtomarine, Rei-Sea, Tokyo, Japan), 34‰, pH 7.8 at 19–20°C. Fish were allowed to settle for a minimum of two days before experimentation and during this time food was withheld. Holding tank water ammonia levels averaged  $113 \pm 14 \mu\text{mol l}^{-1}$ , significantly below control ammonia levels in the plasma (see Results). All procedures used were approved by the Tokyo Institute of Technology Institutional Animal Care and Use Committee.

### High environmental ammonia (HEA) and hypercapnia exposures

Three experimental series were performed. For all exposures, individual fish were transferred immediately from the holding tank into a darkened box filled with 4 l of aerated, artificial seawater at

19–20°C. Control fish were treated identically to the experimental fish with no addition of  $NH_4HCO_3$  or  $CO_2$  to the external water.

In Series 1, fish were exposed to HEA comprising of a nominal total ammonia ( $T_{\text{Amm}}$ ) concentration of  $1 \text{ mmol l}^{-1} NH_4HCO_3$  (pH  $7.75 \pm 0.05$ ) for 6, 24 or 48 h. In Series 2, an additional batch of fish was exposed to a higher level of HEA,  $5 \text{ mmol l}^{-1} NH_4HCO_3$  (pH  $7.75 \pm 0.05$ ), for 12 h. In Series 3, pufferfish were exposed to hypercapnia; a 1%  $CO_2$  in air mixture was bubbled into the water over the course of 24 h. This reduced the water pH by approximately 0.6 pH units.

### Ammonia analysis and tissue sampling

During all exposure periods, water samples (10 ml) were taken every 3 h, frozen at  $-20^\circ\text{C}$  and later assayed in triplicate for  $T_{\text{Amm}}$  using a modified salicylate–hypochlorite method (Verdouw et al., 1978). Net excretion rates of total ammonia ( $J_{\text{Amm}}$ ,  $\mu\text{mol kg}^{-1} \text{ h}^{-1}$ ) were calculated as previously described (Nawata et al., 2007). A negative  $J_{\text{Amm}}$  indicates a net excretion of ammonia to the water and a positive  $J_{\text{Amm}}$  indicates a net uptake of ammonia into the fish.

After the exposure periods, the fish were terminally anaesthetised with neutralised MS222 ( $0.1 \text{ g l}^{-1}$ ). Blood was drawn into a heparinised syringe from the hepatic vein and samples were then centrifuged to separate plasma from erythrocytes (2 min,  $14,000 \text{ g}$ ), and both fractions (with the buffy coat excluded) were snap frozen in liquid nitrogen and stored at  $-80^\circ\text{C}$ . Erythrocytes for protein analysis were processed as described below. Immediately following blood sample removal, the gills were perfused free of blood with ice-cold phosphate buffered saline through the bulbus arteriosus. Gills and skin sections were quickly excised and flash frozen in liquid nitrogen and stored at  $-80^\circ\text{C}$  until processing. Plasma was later analysed enzymatically for  $T_{\text{Amm}}$  (Raichem, Cliniqua Corp., San Marcos, CA, USA), an assay that measures the formation of L-glutamate catalysed by L-glutamate dehydrogenase. This assay is linear up to  $600 \mu\text{mol l}^{-1}$  and therefore more concentrated samples were appropriately diluted with ammonia-free water. Reproducibility was  $\pm 5\%$ . Although the method of blood sampling used here could potentially alter the blood chemistry due to stress-related factors, we wanted to avoid the more confounding issue of Rh gene expression alteration associated with surgically implanted dorsal aortic catheters, as previously reported for rainbow trout (Nawata and Wood, 2009).

### RNA extraction and real-time quantitative PCR (qPCR)

Total RNA was extracted from blood and tissues by the acid guanidine isothiocyanate–phenol–chloroform method with Isogen (Nippon Gene Co., Toyama, Japan) and quantified spectrophotometrically. First strand cDNA was synthesised from  $1 \mu\text{g}$  total RNA (DNaseI-treated; Invitrogen, Carlsbad, CA, USA) with an oligo(dT<sub>17</sub>) primer and Superscript II reverse transcriptase (Invitrogen). Rh mRNA expression was assessed in the gill, skin and erythrocytes, and  $H^+$ -ATPase (V-type, B-subunit), NHE1, NHE2, NHE3, NKA ( $\alpha$ -subunit) and NKCC1 mRNA expressions were analysed in the gill using the above-described cDNA. Rh primers were designed from their known sequences (fRhag, AB218979; fRhbg, AB218980; fRhcg1, AB218981; fRhcg2, AB218982) and all other primers were designed based on the fugu genomic database (<http://uswest.ensembl.org>). Primer sets (listed in Table 1) were tested and products were sequenced. qPCR reactions were performed using Sybr Premix ExTaq II (Takara Bio, Otsu, Japan) on a Thermal Cycler Dice Real-Time System (Takara Bio). Melt-curve analysis verified production of a single product, and no-template controls and non-reversed-transcribed controls were run

Table 1. Primer list for qRT-PCR

| Name                     | Forward / reverse (5'-3')                    |
|--------------------------|----------------------------------------------|
| <i>Rhag</i>              | cggtaatcacaccaggaag / atttgatctggcgtctc      |
| <i>Rhbg</i>              | tgctatcacctgtttcatcc / caacgctaccgaagccatac  |
| <i>Rhcg1</i>             | catggtgccccaagc / ctctctcatcttcaggcag        |
| <i>Rhcg2</i>             | caagtacgcagacaggtcg / gtctgggtgcttggtac      |
| <i>H<sup>+</sup>-ATP</i> | ccgatcaaccctcagtg / tgggtatttctggcctcg       |
| <i>NHE1</i>              | agaacctggggacaatctc /<br>aaacaatggagccaacagc |
| <i>NHE2</i>              | catgtctctcatcagc / tctcaaagaagccctggg        |
| <i>NHE3</i>              | atgcttggctcattctgg / cccagggtgctgaagaag      |
| <i>NKA</i>               | gtgtgtgaccctgactgc / gcctcatggatctgggttc     |
| <i>NKCC1</i>             | aggctgctgtaagaatcg / cgtacaaatcattgggttc     |
| <i>β-actin</i>           | ggctgtgctcctgtatg / gaaggagtaccacgctcg       |

in parallel. Values were extrapolated from standard curves generated by serial dilution of one randomly selected control sample. *Beta actin* ( $\beta$ -actin) mRNA, *elongation factor-1 $\alpha$*  mRNA and 18S rRNA were tested for stability as normalising genes using geNorm software (Vandesompele et al., 2002).  $\beta$ -actin was identified as the most stable gene within tissues and across treatments and was therefore chosen for normalisation. The mean cycle threshold ( $C_t$ )  $\pm$  s.d. of  $\beta$ -actin was 17.93 $\pm$ 0.94 in the gill, 18.31 $\pm$ 0.78 in the skin and 19.56 $\pm$ 1.42 in the blood.

#### Western blot analysis

Analyses were performed on gill samples taken from the last time point in all three experimental series (48 h for 1 mmol l<sup>-1</sup> NH<sub>4</sub>HCO<sub>3</sub>, 12 h for 5 mmol l<sup>-1</sup> NH<sub>4</sub>HCO<sub>3</sub> and 24 h for hypercapnia exposure). Whole gill arches as well as skin samples were homogenised in buffer (25 mmol l<sup>-1</sup> Tris-HCl, 250 mmol l<sup>-1</sup> sucrose, 1 mmol l<sup>-1</sup> EDTA, and protease inhibitor cocktail, pH 7.4) and centrifuged at 4500 g for 15 min at 4°C. The supernatant was then collected and centrifuged at 200,000 g for 1 h at 4°C. The resulting pellets were resuspended in homogenisation buffer, adjusted to 1  $\mu$ g  $\mu$ l<sup>-1</sup> and then boiled for 15 min at 70°C. Erythrocytes from 24 h exposures to 1 mmol l<sup>-1</sup> NH<sub>4</sub>HCO<sub>3</sub> or hypercapnia were separated from plasma and the buffy coat by centrifugation as described earlier, then washed three times in isotonic phosphate buffer and resuspended in an equal volume of buffer. Erythrocyte membrane protein was isolated by lysing 1 ml washed erythrocytes in 30 ml of ice-cold hypotonic phosphate buffer (5 mmol l<sup>-1</sup> sodium phosphate, 0.5 mmol l<sup>-1</sup> EGTA and protease inhibitor cocktail, pH 8.0) and centrifugation at 14,000 g for 15 min at 4°C. The pellet was washed several times in ice-cold buffer until free of haemoglobin, solubilised in 1% SDS, and then adjusted to 1  $\mu$ g  $\mu$ l<sup>-1</sup> and boiled for 15 min at 70°C.

Protein concentrations were determined using a BCA assay (Thermo Fisher Scientific Inc., Rockford IL, USA). In some tests, denatured protein samples were deglycosylated prior to blotting using Peptide:N-glycosidase F (PNGase F; New England Biolabs, Pickering, ON, Canada) according to manufacturer's instruction. Samples were separated by 10% SDS-PAGE and transferred onto polyvinylidene difluoride membranes. Non-specific binding was blocked with 5% non-fat skimmed milk in TBST (100 mmol l<sup>-1</sup> Tris-HCl, pH 7.5, 150 mmol l<sup>-1</sup> NaCl and 0.1% Tween 20) for 1 h at room temperature. The membranes were incubated with anti-fRhag (1:30,000), anti-fRhbg (1:10,000), anti-fRhcg1 (1:30,000), anti-fRhcg2 (1:30,000) (Nakada et al., 2007) or anti-eel NKA (1:30,000) (Mistry et al., 2001) antiserum at room temperature for 2–3 h. After washing with TBST, membranes were then reacted with horseradish peroxidase-conjugated goat anti-rabbit IgG (1:60,000; Cell Signaling, New England Biolabs) for 1 h at room temperature. The

bound secondary antibody was visualised by enhanced chemiluminescence detection using Immobilon Western HRP Substrate (Millipore Corporation, Billerica, MA, USA) and band density was measured using ImageJ software (<http://rsb.info.nih.gov/ij/>). One randomly chosen sample was used on every gel for normalisation of different immunoblots.

#### Enzyme analysis

NKA activity and *N*-ethylmaleimide-sensitive H<sup>+</sup>-ATPase activity were measured in crude gill homogenates of control fish and those exposed to either 1 mmol l<sup>-1</sup> NH<sub>4</sub>HCO<sub>3</sub> for 48 h or 5 mmol l<sup>-1</sup> NH<sub>4</sub>HCO<sub>3</sub> for 12 h, following the methodology of McCormick (McCormick, 1993) as described previously (Nawata et al., 2007). To assess NH<sub>4</sub><sup>+</sup> activation of NKA, the assay was performed under optimised conditions containing either 10 mmol l<sup>-1</sup> KCl or 10 mmol l<sup>-1</sup> NH<sub>4</sub>Cl (replacing KCl) in the reaction medium. Activities were then measured in the absence and presence of ouabain.

#### Statistical analysis

Data are presented as means  $\pm$  s.e.m.,  $N$ =number of fish. Enzyme activities and the effect of 1 mmol l<sup>-1</sup> NH<sub>4</sub>HCO<sub>3</sub> exposure on mRNA expression levels were analysed by one-way analysis of variance (ANOVA) followed by Fisher's Least Significant Difference *post-hoc* test. Student's unpaired *t*-test was used to analyse the effect of 5 mmol l<sup>-1</sup> NH<sub>4</sub>HCO<sub>3</sub> and hypercapnia exposure on mRNA expression, differences in protein levels and K<sup>+</sup> vs NH<sub>4</sub><sup>+</sup> activated ATPase activity. Significance was set at  $\alpha$ =0.05.

## RESULTS

### Experimental series 1: HEA – 1 mmol l<sup>-1</sup> NH<sub>4</sub>HCO<sub>3</sub>

Under control conditions, pufferfish excreted ammonia at a rate of about 378  $\mu$ mol kg<sup>-1</sup> h<sup>-1</sup>. During the first 3 h of exposure to 1 mmol l<sup>-1</sup> NH<sub>4</sub>HCO<sub>3</sub>, there was a large net uptake of ammonia (~1157  $\mu$ mol kg<sup>-1</sup> h<sup>-1</sup>) into the fish. After 3 h, excretion resumed with a magnitude about 2.5-fold over that of the control rate (Fig. 1). Thereafter, the excretion stabilised at a rate not significantly different from that of the control. Plasma ammonia increased 2.5-fold from a control level of about 350  $\mu$ mol l<sup>-1</sup>, reaching a steady state across time during this exposure, averaging 795  $\mu$ mol l<sup>-1</sup>

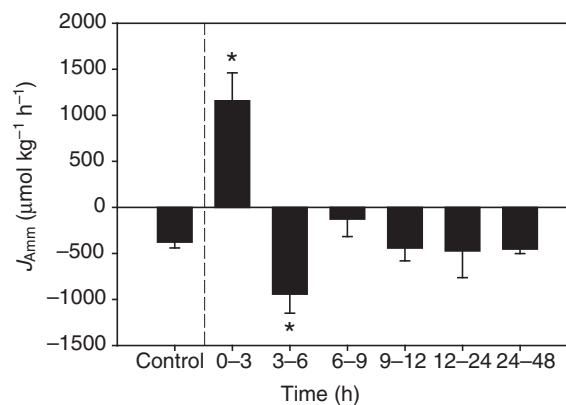

Fig. 1. Ammonia excretion rate ( $J_{\text{Amm}}$ ) of pufferfish exposed to 1 mmol l<sup>-1</sup> NH<sub>4</sub>HCO<sub>3</sub>. The control value represents the 24 h excretion rate in untreated fish. Negative values indicate net excretion and positive value indicates net uptake. Asterisks represent significant differences from the control value ( $P$ >0.05). Data are means  $\pm$  s.e.m. ( $N$ =6). The vertical broken line separates the control value from the time points.

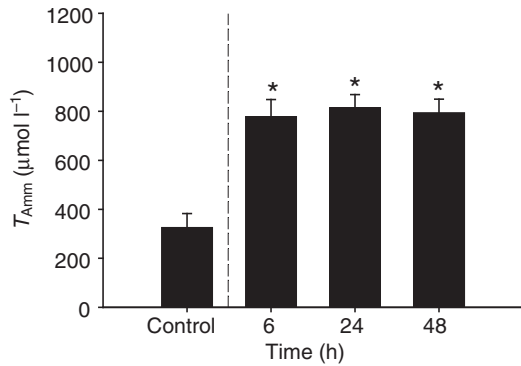

Fig. 2. Plasma ammonia levels ( $T_{\text{Amm}}$ ) in pufferfish exposed to  $1 \text{ mmol l}^{-1}$   $\text{NH}_4\text{HCO}_3$ . Asterisks represent significant differences from the control (untreated) fish ( $P > 0.05$ ). Data are means  $\pm$  s.e.m. ( $N=6$ ). The vertical broken line separates the control value from the time points.

(Fig. 2) and significantly below the mean water ammonia concentration of  $936 \mu\text{mol l}^{-1}$ .

Analysis of gill mRNA expression levels revealed a 5-fold upregulation of *Rhcg1* over the control level at 48 h (Fig. 3). Levels of *Rhag* mRNA were significantly downregulated by about 50% at all time points and similarly, *Rhbg* mRNA levels were reduced to about half of the control levels at 24 and 48 h. By contrast, *Rhcg2* mRNA levels remained unchanged across time. While there was a significant 50% decrease in *NHE2* mRNA levels at 24 and 48 h, there was a significant 2-fold increase in *H<sup>+</sup>-ATPase*, *NHE3*, *NKCC1* and *NKA* mRNA at 48 h, and no change in *NHE1* mRNA levels (Fig. 4). In the erythrocytes, there was a 75% decrease in *Rhag* mRNA expression (Fig. 5). *Rhbg* mRNA was decreased in the skin but not significantly ( $P=0.06$ ) and similarly no significant changes were seen in skin *Rhcg2* mRNA levels (Fig. 5).

#### Experimental series 2: HEA – $5 \text{ mmol l}^{-1}$ $\text{NH}_4\text{HCO}_3$

To raise the plasma ammonia, without using an invasive infusion procedure, to a level higher than that achieved after exposure to  $1 \text{ mmol l}^{-1}$   $\text{NH}_4\text{HCO}_3$ , fish were exposed to  $5 \text{ mmol l}^{-1}$   $\text{NH}_4\text{HCO}_3$

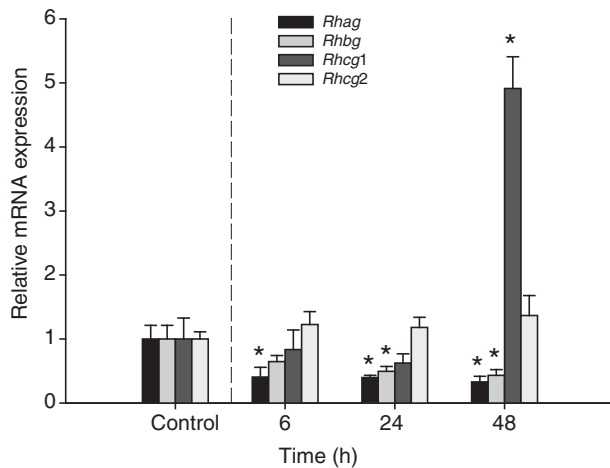

Fig. 3. Expression of *Rhag*, *Rhbg*, *Rhcg1* and *Rhcg2* mRNA relative to  $\beta$ -actin in the gills of pufferfish exposed to  $1 \text{ mmol l}^{-1}$   $\text{NH}_4\text{HCO}_3$ . Asterisks represent significant difference from the corresponding control (untreated) fish ( $P > 0.05$ ). Data are means  $\pm$  s.e.m. ( $N=6$ ). The vertical broken line separates the control value from the time points.

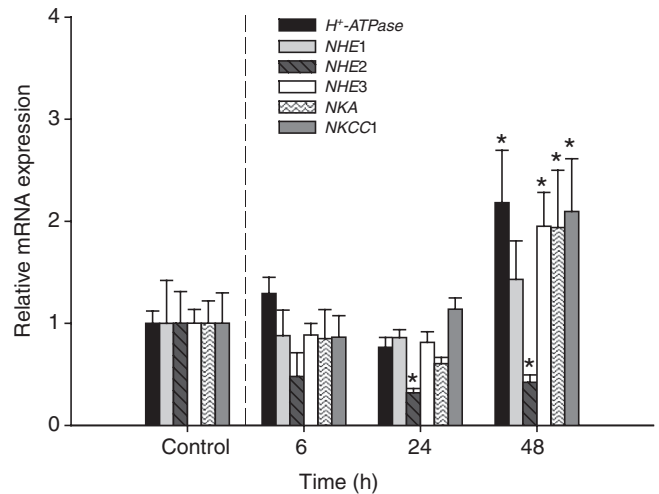

Fig. 4. Expression of *H<sup>+</sup>-ATPase*, *NHE1*, *NHE2*, *NHE3*, *Na<sup>+</sup>/K<sup>+</sup>-ATPase* (*NKA*) and *NKCC1* mRNA relative to  $\beta$ -actin in the gills of pufferfish exposed to  $1 \text{ mmol l}^{-1}$   $\text{NH}_4\text{HCO}_3$ . Asterisks represent significant differences from the corresponding control (untreated) fish ( $P > 0.05$ ). Data are means  $\pm$  s.e.m. ( $N=6$ ). The vertical broken line separates the control value from the time points.

for 12 h. No signs of toxicity were observed at this ammonia level but in a preliminary trial  $8 \text{ mmol l}^{-1}$  proved to be toxic. Similar to the HEA exposure at  $1 \text{ mmol l}^{-1}$   $\text{NH}_4\text{HCO}_3$ , during the first 3 h of exposure to  $5 \text{ mmol l}^{-1}$   $\text{NH}_4\text{HCO}_3$ , there was a net uptake of ammonia ( $1556 \mu\text{mol kg}^{-1} \text{ h}^{-1}$ ) into the fish. After 3 h, excretion resumed at a magnitude 4-fold over that of the control rate (Fig. 6).

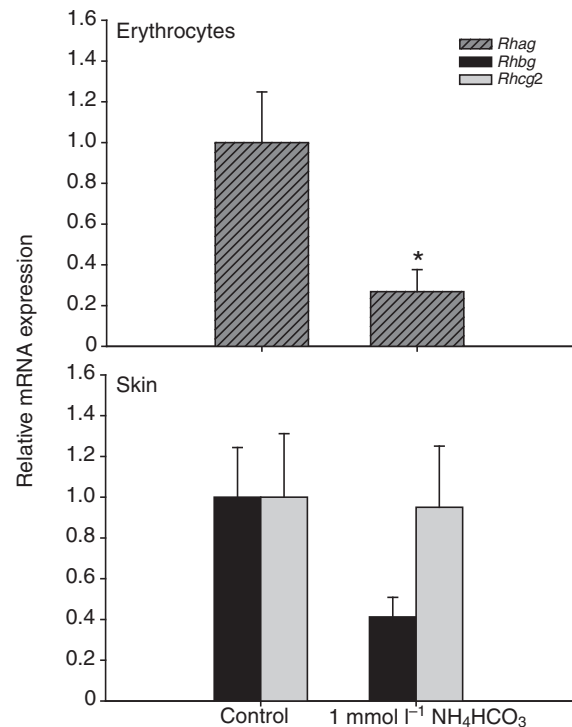

Fig. 5. Expression of erythrocytic *Rhag* mRNA and skin *Rhbg* and *Rhcg2* mRNA relative to  $\beta$ -actin in pufferfish exposed to  $1 \text{ mmol l}^{-1}$   $\text{NH}_4\text{HCO}_3$ . Asterisk represents significant difference from the control (untreated) fish ( $P > 0.05$ ). Data are means  $\pm$  s.e.m. ( $N=6$ ).



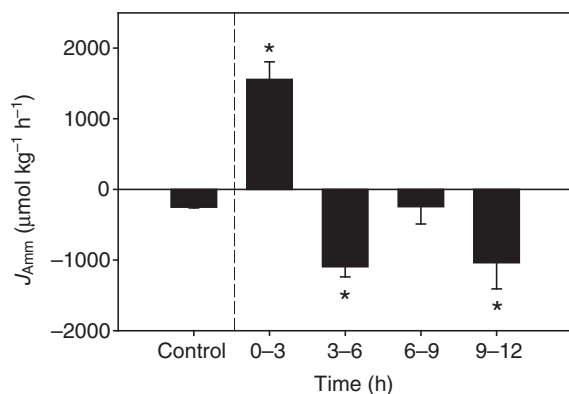

Fig. 6. Ammonia excretion rate ( $J_{\text{Amm}}$ ) of pufferfish exposed to  $5 \text{ mmol l}^{-1}$   $\text{NH}_4\text{HCO}_3$ . The control value represents the 12 h excretion rate in untreated fish. Negative values indicate net excretion and positive values indicate net uptake. Asterisks represent significant differences from the control value ( $P > 0.05$ ). Data are means  $\pm$  s.e.m. ( $N=5$ ). The vertical broken line separates the control value from the time points.

Excretion continued at this elevated rate at 9–12 h. The plasma ammonia at 12 h was increased 7.8-fold over the control ( $2520 \pm 79 \mu\text{mol l}^{-1}$  vs  $325 \pm 58 \mu\text{mol l}^{-1}$ ) (data not shown) but remained far below the water level ( $4552 \pm 63 \mu\text{mol l}^{-1}$ ).

Exposure to  $5 \text{ mmol l}^{-1}$   $\text{NH}_4\text{HCO}_3$  resulted in the upregulation of expression levels in the gill of both *Rhcg1* and *Rhcg2* mRNA (5.4- and 1.8-fold, respectively) at 12 h. However, mRNA levels of *Rhag* and *Rhbg* were not significantly altered (Table 2). Analysis of other gill transporters revealed a significant 1.9-fold increase in  $\text{H}^+$ -ATPase and a 2.2-fold increase in *NKCC1* mRNA but no significant changes in the mRNA levels of *NHE1*, *NHE2*, *NHE3* or *NKA* (Table 3). As with exposure to  $1 \text{ mmol l}^{-1}$   $\text{NH}_4\text{HCO}_3$ , there was a significant 80% decrease in *Rhag* mRNA expression in the erythrocytes (Table 2). In the skin, both *Rhbg* and *Rhcg2* mRNA levels were significantly elevated by 2.3- and 2.8-fold, respectively (Table 2).

### Experimental series 3: hypercapnia

With the exception of a significant 1.7-fold increase in the ammonia excretion rate over the control rate at 6–9 h, excretion rates remained unchanged during exposure to 24 h of hypercapnia (data not shown). Likewise, the plasma ammonia level after 24 h of hypercapnia ( $259 \pm 36 \mu\text{mol l}^{-1}$ ) was not significantly different from the control value ( $358 \pm 57 \mu\text{mol l}^{-1}$ ) (data not shown). Analysis of mRNA levels in the gill showed a 77% decrease in *Rhag* but no significant changes

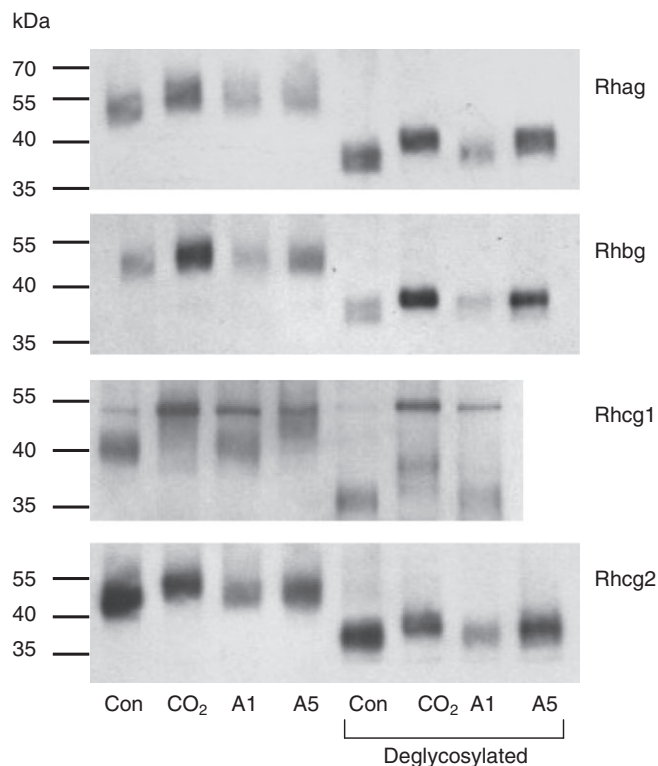

Fig. 7. Representative western blots of Rhag, Rhbg, Rhcg1 and Rhcg2 in the gills of pufferfish that were untreated (Con), exposed to 1%  $\text{CO}_2$  in air for 24 h ( $\text{CO}_2$ ), exposed to  $1 \text{ mmol l}^{-1}$   $\text{NH}_4\text{HCO}_3$  for 48 h (A1), or exposed to  $5 \text{ mmol l}^{-1}$   $\text{NH}_4\text{HCO}_3$  for 12 h (A5). Due to sample loss, the last lane (A5) is missing from the Rhcg1 blot; however, preliminary results showed similar band migration as that seen for A1.

in the mRNA levels of *Rhbg*, *Rhcg1* or *Rhcg2* (Table 2). Similarly, in the skin, there were no changes in the *Rhbg* or *Rhcg2* mRNA levels (Table 2). *Rhag* mRNA levels in the erythrocytes, however, were significantly decreased by 93% (Table 2).

### Protein analyses

Western blotting of whole gill homogenates failed to provide clear bands; therefore, we analysed the membrane protein enriched fraction, which by contrast, produced distinct bands. The Rhag band in the experimental gill samples from the HEA- and hypercapnia-exposed fish migrated at a higher apparent molecular mass (~8 kDa)

Table 2. Relative mRNA expression of Rh genes in the gills, skin and erythrocytes of pufferfish exposed to  $5 \text{ mmol l}^{-1}$   $\text{NH}_4\text{HCO}_3$  and hypercapnia (1%  $\text{CO}_2$  in air)

| Treatment                                         | <i>Rhag</i> (gill) | <i>Rhbg</i> (gill) | <i>Rhcg1</i> (gill) | <i>Rhcg2</i> (gill) | <i>Rhbg</i> (skin) | <i>Rhcg2</i> (skin) | <i>Rhag</i> (erythrocytes) |
|---------------------------------------------------|--------------------|--------------------|---------------------|---------------------|--------------------|---------------------|----------------------------|
| Untreated                                         | 1.00 $\pm$ 0.21    | 1.00 $\pm$ 0.21    | 1.00 $\pm$ 0.33     | 1.00 $\pm$ 0.11     | 1.00 $\pm$ 0.24    | 1.00 $\pm$ 0.31     | 1.00 $\pm$ 0.25            |
| $5 \text{ mmol l}^{-1}$ $\text{NH}_4\text{HCO}_3$ | 0.54 $\pm$ 0.16    | 1.19 $\pm$ 0.30    | 5.40 $\pm$ 1.21*    | 1.84 $\pm$ 0.33*    | 2.33 $\pm$ 0.51*   | 2.81 $\pm$ 0.74*    | 0.18 $\pm$ 0.07*           |
| 1% $\text{CO}_2$ in air                           | 0.23 $\pm$ 0.071*  | 0.44 $\pm$ 0.08    | 0.64 $\pm$ 0.18     | 0.88 $\pm$ 0.11     | 1.57 $\pm$ 0.40    | 0.50 $\pm$ 0.14     | 0.07 $\pm$ 0.02*           |

Data are normalised to beta actin. Values are means  $\pm$  s.e.m. ( $N=5-6$ ). \*Significant difference from the untreated control ( $P < 0.05$ ).

Table 3. Relative mRNA expression of transporter genes in the gills of pufferfish exposed to  $5 \text{ mmol l}^{-1}$   $\text{NH}_4\text{HCO}_3$

| Treatment                                         | $\text{H}^+$ -ATPase | <i>NHE1</i>     | <i>NHE2</i>     | <i>NHE3</i>     | <i>NKA</i>      | <i>NKCC1</i>     |
|---------------------------------------------------|----------------------|-----------------|-----------------|-----------------|-----------------|------------------|
| Untreated                                         | 1.00 $\pm$ 0.14      | 1.00 $\pm$ 0.42 | 1.00 $\pm$ 0.31 | 1.00 $\pm$ 0.14 | 1.00 $\pm$ 0.22 | 1.00 $\pm$ 0.3   |
| $5 \text{ mmol l}^{-1}$ $\text{NH}_4\text{HCO}_3$ | 1.89 $\pm$ 0.24*     | 2.71 $\pm$ 0.79 | 0.58 $\pm$ 0.17 | 1.57 $\pm$ 0.35 | 2.16 $\pm$ 0.52 | 2.25 $\pm$ 0.14* |

Data are normalised to beta actin. Values are means  $\pm$  s.e.m. ( $N=5-6$ ). \*Significant difference from the untreated control ( $P < 0.05$ ).

than that in the control sample, which appeared at the predicted molecular mass of 47 kDa (Fig. 7). Two Rhcg1 bands were detected in the control and experimental samples (~39 and 54 kDa). Heavier staining of the 54 kDa band (the predicted molecular mass of Rhcg1) was observed in the experimental samples. The Rhbg and Rhcg2 bands in the control samples had lower apparent molecular masses than those in the corresponding experimental samples, which migrated closer to their predicted molecular masses (49 and 53 kDa, respectively, for Rhbg and Rhcg2). These mobility shifts prevented reliable quantification of Rh protein expression changes during the treatments but prompted us to investigate the cause of this phenomenon. When the proteins were experimentally deglycosylated, all samples displayed the expected decrease in molecular mass but a mobility shift persisted in samples from the HEA and hypercapnia treatments. In the case of Rhcg1, the 54 kDa-band persisted (Fig. 7).

While we were unable to obtain good visualisation of Rhbg in the skin, Rhcg2 appeared as a doublet in samples from both control and HEA treatments at around the same molecular mass as the control gill Rhcg2 band (~42–47 kDa). An additional band was detected at the predicted molecular mass of 53 kDa (Fig. 8).

There were no molecular mass differences between control and experimental erythrocyte Rhag samples either before or after deglycosylation, thereby allowing us to quantify these proteins. Erythrocyte Rhag levels did not change in response to 24 h of hypercapnia or HEA ( $1 \text{ mmol l}^{-1} \text{ NH}_4\text{HCO}_3$ ) when compared with the control (Fig. 9). Analysis of NKA protein levels in the gill revealed a significant increase in expression with 48 h of  $1 \text{ mmol l}^{-1} \text{ NH}_4\text{HCO}_3$  exposure but a significant decrease after exposure to 12 h of  $5 \text{ mmol l}^{-1} \text{ NH}_4\text{HCO}_3$  (Fig. 10).

#### Enzyme activity

A significant 1.4-fold increase in NKA activity was noted in the gills of fish exposed to  $1 \text{ mmol l}^{-1} \text{ NH}_4\text{HCO}_3$  for 48 h when compared with the control fish (Fig. 11). Activities in the gills when  $\text{K}^+$  was substituted with  $\text{NH}_4^+$  were lower but not significantly different from the corresponding activities when  $\text{K}^+$  was present.  $\text{H}^+$ -ATPase activity was significantly elevated by about 2-fold in the gills of fish exposed to  $5 \text{ mmol l}^{-1} \text{ NH}_4\text{HCO}_3$  when compared with the activity in the gills of control fish (Fig. 11).

#### DISCUSSION

In the present study we have provided the first experimental evidence linking Rh proteins to ammonia excretion in a seawater fish species. Some important differences in ammonia handling between freshwater and seawater species have been revealed, and an earlier model (based only on immunohistochemistry and *in situ* hybridisation) for ammonia excretion across the pufferfish gill (Nakada et al., 2007) has been largely supported by a combined molecular and physiological approach.

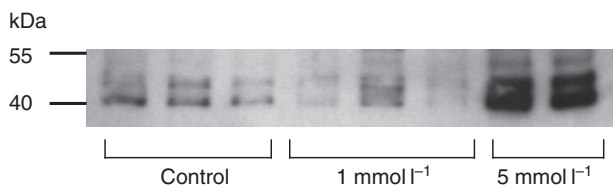

Fig. 8. Western blot of Rhcg2 in the skin of pufferfish that were untreated (Control) or exposed to  $1 \text{ mmol l}^{-1} \text{ NH}_4\text{HCO}_3$  for 48 h or to  $5 \text{ mmol l}^{-1} \text{ NH}_4\text{HCO}_3$  for 12 h.

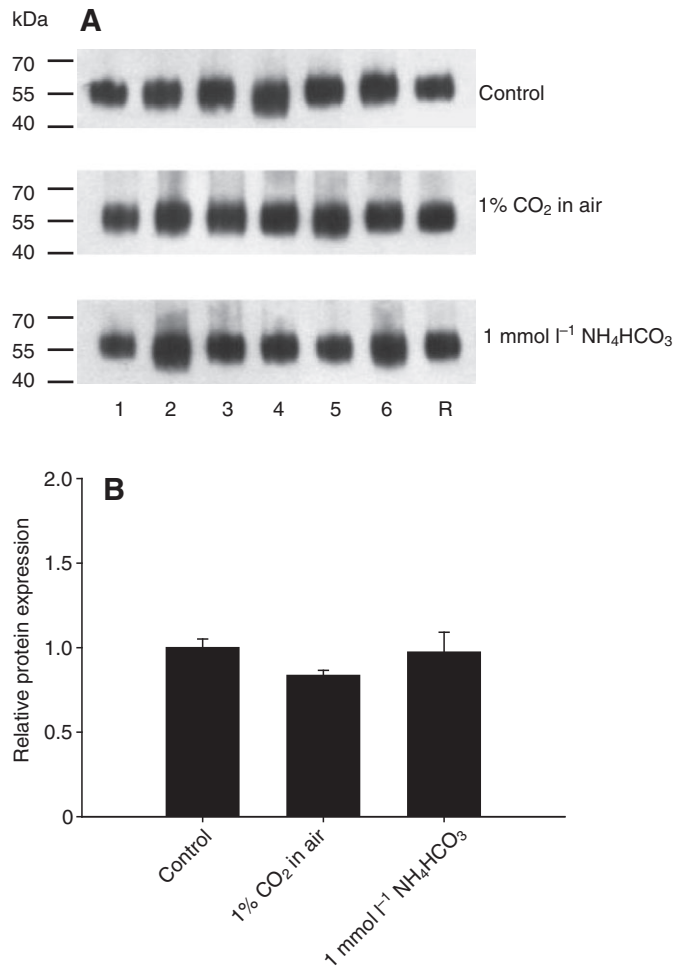

Fig. 9. (A) Western blots and (B) quantification of Rhag protein levels in isolated erythrocyte membranes of control (untreated) pufferfish and those exposed to 24 h of hypercapnia ( $1\% \text{ CO}_2$  in air) or  $1 \text{ mmol l}^{-1} \text{ NH}_4\text{HCO}_3$ . A reference sample (R) was used to equalise signal intensities from different blots. There were no significant differences in protein levels between the experimental samples and the control (untreated) samples. Data are means  $\pm$  s.e.m. ( $N=6$ ).

The main goal of our study was to determine the patterns of ammonia excretion and Rh expression in pufferfish gills after HEA exposure. Fish exposed to HEA are not only challenged with the influx of ammonia but, over time, are also faced with accumulating levels of endogenous ammonia. During exposure to HEA, pufferfish were able to maintain plasma ammonia levels constant at about 2.5-fold above the control levels and below those in the external water (Fig. 2). By contrast, rainbow trout exposed to HEA in freshwater had plasma ammonia levels elevated almost 10-fold over the control by 48 h (Nawata et al., 2007). Pufferfish, therefore, appear to regulate plasma ammonia levels more quickly than the rainbow trout during HEA.

It is important to note that our calculations of trans-gill ammonia gradients are based on measurements of total ammonia concentrations in blood plasma and water. Traditionally, it has been assumed that ammonia flux across fish gills is driven by the partial pressure of ammonia ( $P_{\text{NH}_3}$ ) or  $\text{NH}_4^+$  electrochemical gradients (e.g. Cameron and Heisler, 1983; Evans et al., 2005). However, it is unclear whether or not ammonia moves across the gill as  $\text{NH}_3$ ,  $\text{NH}_4^+$  or both in seawater fish during HEA and therefore total ammonia

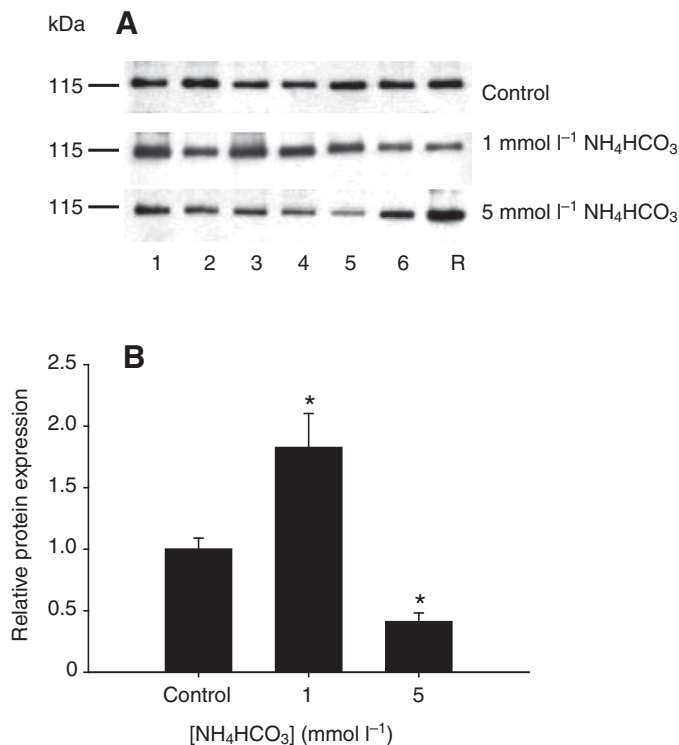

Fig. 10. (A) Western blots and (B) quantification of Na<sup>+</sup>/K<sup>+</sup>-ATPase protein levels in the gills of control (untreated) pufferfish and those exposed to NH<sub>4</sub>HCO<sub>3</sub> (1 mmol l<sup>-1</sup> NH<sub>4</sub>HCO<sub>3</sub> for 48 h or 5 mmol l<sup>-1</sup> for 12 h). A reference sample (R) was used to equalise signal intensities from different blots. Asterisks represent significant differences from the control (untreated) fish ( $P < 0.05$ ). Data are means  $\pm$  s.e.m. ( $N = 5-6$ ).

gradients remain informative. For the purposes of our study, we were interested in determining whether or not pufferfish were able to maintain total plasma ammonia levels lower than those in the external water. Future investigations should include accurate determinations of  $P_{\text{NH}_3}$  gradients across the gill that would include both blood plasma and gill boundary layer pH, and NH<sub>4</sub><sup>+</sup> electrochemical gradients that would take into account transepithelial potential. These would require cannulation – an approach we wished to avoid in the present study.

Recovery of ammonia excretion in pufferfish after exposure to HEA occurred very rapidly at an elevated rate after 3 h, stabilising thereafter to control levels over 48 h (Fig. 1). Resumption of excretion in freshwater rainbow trout occurred only after 12 h at a rate not significantly different from that of the control during the first 12–36 h but enhanced by almost 3-fold at 36–48 h (Nawata et al., 2007). The recovery and enhancement of excretion in the trout coincided with the upregulations of *Rhbg* and *Rhcg2* mRNA in the PVCs, suggesting that these Rh proteins as well as the PVCs have a major role in ammonia excretion during HEA in this freshwater species (Nawata et al., 2007). In the pufferfish, the *Rhcg* gene that eventually responded after 48 h of exposure to 1 mmol l<sup>-1</sup> NH<sub>4</sub>HCO<sub>3</sub> was *Rhcg1* rather than *Rhcg2*, and *Rhbg* expression never increased (Fig. 3), suggesting a very different system than in the freshwater trout.

Some fish are able to detoxify ammonia by converting it into urea (Mommensen and Walsh, 1992). However, this process was ruled out as a significant factor in the pufferfish because plasma urea as well as amino acid levels in control and HEA-exposed fish were not significantly different from each other (data not shown).

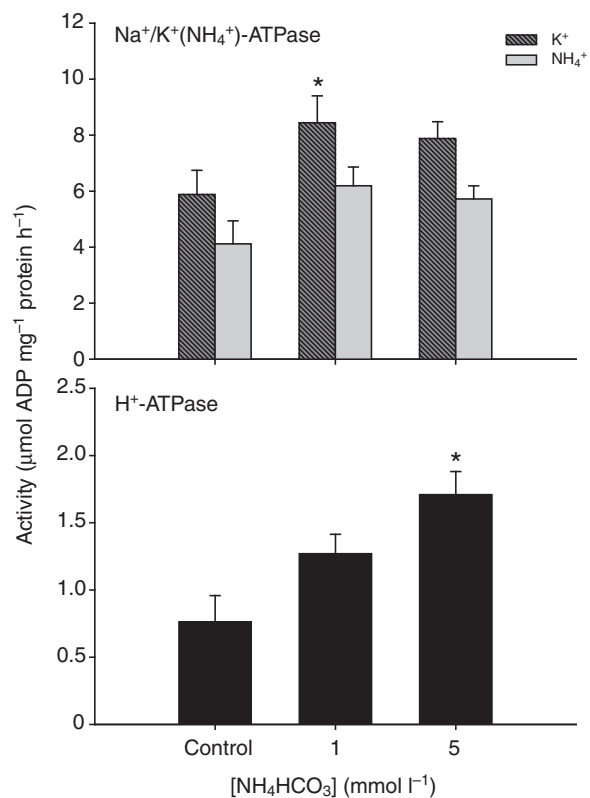

Fig. 11. Enzyme activities of Na<sup>+</sup>/K<sup>+</sup>-ATPase (with K<sup>+</sup> present and with K<sup>+</sup> replaced by NH<sub>4</sub><sup>+</sup> in the reaction) and H<sup>+</sup>-ATPase in the gills of control (untreated) pufferfish and those exposed to NH<sub>4</sub>HCO<sub>3</sub> (1 mmol l<sup>-1</sup> NH<sub>4</sub>HCO<sub>3</sub> for 48 h or 5 mmol l<sup>-1</sup> for 12 h). Asterisks represent significant differences from activity levels in control (untreated) fish ( $P < 0.05$ ). Activities when K<sup>+</sup> was present and when K<sup>+</sup> was replaced by NH<sub>4</sub><sup>+</sup> were not significantly different from each other within each treatment group. Data are means  $\pm$  s.e.m. ( $N = 5-6$ ).

Additionally, urea transporter mRNA expression levels in the gill and liver were unaffected by HEA exposure while *Rhcg2* mRNA expression was significantly increased in the liver after exposure to 5 mmol l<sup>-1</sup> NH<sub>4</sub>HCO<sub>3</sub> (data not shown).

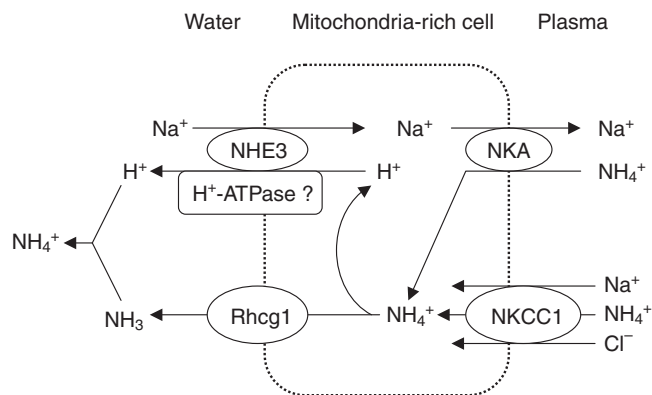

Fig. 12. Preliminary working model of Rhcg1-mediated ammonia transport in the mitochondria-rich cell of the pufferfish. NH<sub>4</sub><sup>+</sup> enters basolaterally via NKCC1 or Na<sup>+</sup>/K<sup>+</sup>-ATPase (NKA) by substituting for K<sup>+</sup>. On the apical side, NH<sub>3</sub> that exits the Rhcg1 channel combines with a H<sup>+</sup> ion released from NHE3 (and/or H<sup>+</sup>-ATPase) to form NH<sub>4</sub><sup>+</sup> in the gill boundary layer.

While our study was focused mainly on the acute response to HEA at a level comparable with those used previously in other fish species (i.e.  $1 \text{ mmol l}^{-1}$ ), it would be interesting in a future investigation, to conduct a chronic study over several days.  $5 \text{ mmol l}^{-1} \text{ NH}_4\text{HCO}_3$  represents a very high ammonia concentration that pufferfish are unlikely to encounter in the natural environment. However, because we observed a response with this treatment, it would be interesting to make closer comparisons between this treatment and the  $1 \text{ mmol l}^{-1} \text{ NH}_4\text{HCO}_3$  exposure.

#### A role for MRCs during HEA

Because the PVCs comprise over 90% of the cell population in the fish gill epithelium (Evans et al., 2005), it is reasonable to assume that these cells facilitate the majority of the ammonia excretion under basal conditions in both freshwater and seawater fish. In the pufferfish, *Rhbg* is limited to the basolateral region of the PVCs, while *Rhcg1* is limited to the apical region of the MRCs (Nakada et al., 2007). HEA exposure to pufferfish resulted in the downregulation of *Rhbg* and upregulation of *Rhcg1* mRNA levels in the gill over time (Fig. 3). This suggests that the persistence of elevated plasma ammonia may have triggered the recruitment of MRCs into the excretion process. Ammonia entry into the PVCs via *Rhbg* would be reduced and redirected to the MRCs where increased *Rhcg1* levels would favour apical exit through this route. Only when plasma ammonia levels were very high (after exposure to  $5 \text{ mmol l}^{-1} \text{ NH}_4\text{HCO}_3$ ), did we observe an upregulation of *Rhcg2* as well as *Rhcg1* and a restoration of *Rhbg* to control levels (Table 2). In this extreme situation where ammonia excretion was enhanced over the control rate (Fig. 6), additional support from the PVCs may be necessary.

#### The role of Rhag

*Rhag* has been detected in the gills of zebrafish (Braun et al., 2009) and in the longhorn sculpin (Claiborne et al., 2008) and has been localised to the basolateral and apical regions of the pillar cells in the gills of pufferfish (Nakada et al., 2007). Gill *Rhag* mRNA levels were significantly downregulated throughout the HEA exposure period (Fig. 3). Under low environmental ammonia conditions, *Rhag* in the pufferfish pillar cells may facilitate the unidirectional movement of ammonia from the blood to the gill for excretion into the external water. However, it is known that Rh proteins transport ammonia and methylamine in a bi-directional manner (Marini et al., 2000; Mayer et al., 2006; Nawata et al., 2010; Weidinger et al., 2007; Westhoff et al., 2004) and therefore during HEA, ammonia could also pass from the water into the fish via Rh channels. The downregulation of *Rhag* mRNA levels in the gill during HEA suggests a barrier mechanism to minimise the entry and/or back flux of external ammonia into the general circulation of the pufferfish. The downregulation of *Rhbg* may serve as a similar barrier mechanism to reduce the flux of external ammonia into the fish through the PVCs which make up the vast majority of the gill surface.

*Rhag* mRNA but not protein was also downregulated in the erythrocytes (Figs 5 and 9). A similar downregulation of *Rhag* mRNA in freshwater trout exposed to HEA was also reported (Nawata et al., 2007). The reason for this response is not clear; however, it may be a protective mechanism to prevent uptake of excess  $\text{NH}_3$ , which would result in water uptake and swelling. Also, the buffering action of  $\text{NH}_3$  would interfere with the Bohr effect, disrupting  $\text{O}_2$  uptake and release from haemoglobin (Bruce, 2008).

#### $\text{H}^+$ -ATPase

In the freshwater rainbow trout gill,  $\text{H}^+$ -ATPase has been localised to the apical region of both PVCs and MRCs (Wilson et al., 2000a; Perry and Fryer, 1997). During HEA, gill  $\text{H}^+$ -ATPase mRNA expression and activity increased in the rainbow trout, suggesting that proton excretion may be important for trapping  $\text{NH}_3$  as it exits the PVCs through *Rhcg2* (Nawata et al., 2007). A similar acid-trapping mechanism for  $\text{NH}_3$  was demonstrated in the skin of freshwater zebrafish larvae when  $\text{H}^+$ -ATPase was knocked down (Shih et al., 2008). Also, in the euryhaline crab, *Carcinus maenas*,  $\text{H}^+$ -ATPase is thought to trap cytoplasmic  $\text{NH}_3$  as  $\text{NH}_4^+$  in vesicles for transport and exocytosis from the gill (Weihrauch et al., 2002). While  $\text{H}^+$ -ATPase may have little involvement in ammonia excretion from the mudskipper gill (Randall et al., 1999), it was apparent from the current study that  $\text{H}^+$ -ATPase mRNA expression (Fig. 4) and activity (Table 3) increased in response to HEA in the pufferfish gill. It is tempting to speculate that, similar to the rainbow trout,  $\text{H}^+$ -ATPase may function in cooperation with *Rhcg2* in the PVCs because the mRNA expression and activity of  $\text{H}^+$ -ATPase increased simultaneously with the increase in *Rhcg2* mRNA expression after  $5 \text{ mmol l}^{-1} \text{ NH}_4\text{HCO}_3$  exposure (Table 3). Indeed, an increase in acid secretion would facilitate  $\text{NH}_3$  trapping and reduce entry of  $\text{NH}_3$  from the water through the Rh channels during HEA. The localisation of  $\text{H}^+$ -ATPase and its role in ammonia excretion in the pufferfish gill, however, have yet to be determined.

#### NHE

While eight isoforms of the  $\text{Na}^+/\text{H}^+$  exchangers (NHEs) have been cloned in the zebrafish (Yan et al., 2007), NHE1, NHE2 and NHE3 are the most characterised isoforms in fish (Edwards et al., 2005). Although a clear apical or basolateral gill orientation has not been determined for NHE1 (Edwards et al., 2005), both NHE2 and NHE3 have been localised to the apical region (Evans, 2008). NHEs are thought to play a role in acid-base regulation in both freshwater and seawater fish (Edwards et al., 2005), and in the proximal tubules of the mammalian kidney, NHE3 is thought to be involved in ammonia excretion with  $\text{NH}_4^+$  substituting for  $\text{H}^+$  (Weiner and Hamm, 2006). Experimental evidence suggests that under low environmental ammonia conditions, little or no ammonia excretion occurs via apical  $\text{Na}^+/\text{NH}_4^+$  exchange in seawater fish (Evans, 1982; Evans, 1984; Evans and More, 1988; Evans et al., 1979; Evans et al., 1989); however, under HEA conditions, apical NHE is thought to facilitate  $\text{NH}_4^+$  excretion in the mudskipper (Randall et al., 1999). Although the results from our study did not reveal a change in *NHE1* mRNA expression, *NHE3* mRNA levels were greatly elevated, suggesting a role for this transporter during HEA (Fig. 4). In addition, the downregulation of *NHE2* and the upregulation of *NHE3* mRNA suggest that these two transporters may serve different functions in the pufferfish gill during HEA. Increased  $\text{Na}^+$  loading due to upregulated levels of NHE3 would also necessitate the downregulation of NHE2 to limit or reduce the overall uptake of  $\text{Na}^+$ .

#### NKA

Due to a similar hydrated radius,  $\text{NH}_4^+$  is known to substitute for  $\text{K}^+$  in the NKCC and the NKA in a variety of different tissues (Kinne et al., 1986; Kurtz and Balaban, 1986; Towle and Holleland, 1987; Wall et al., 1995). NKA has been implicated in the basolateral uptake of ammonia in the collecting duct of the mammalian kidney (Kurtz and Balaban, 1986; Wall and Koger, 1994) and similarly, basolateral gill  $\text{Na}^+/\text{NH}_4^+$  exchange via NKA has been suggested from studies



on the toadfish (Claiborne et al., 1982; Mallery, 1983). In fact, active excretion of ammonia against a gradient *via* NKA was demonstrated in mudskippers exposed to HEA (Randall et al., 1999). Ouabain treatment reduced ammonia excretion, but only when the mudskippers were exposed to HEA, suggesting that NKA-mediated  $\text{NH}_4^+$  transport becomes important when the ammonia gradients are reversed and/or when plasma ammonia levels are elevated. Similarly, in isolated perfused gills of the marine crab, *Cancer pagurus*, active ammonia excretion was reduced in the presence of ouabain (Wehrauch et al., 1999). In the current study, NKA clearly responded to HEA in the pufferfish gills. *NKA* mRNA expression and activity were significantly elevated after exposure to 48 h of  $\text{NH}_4\text{HCO}_3$  (Figs 4 and 11), and, furthermore, we have demonstrated that  $\text{NH}_4^+$  was a functional substrate, capable of activating the enzyme in the absence of  $\text{K}^+$  (Fig. 11), as was previously demonstrated with toadfish and mudskipper gill NKA (Mallery, 1983; Randall et al., 1999). Although there was a delay between the transcription and translation of NKA after 12 h exposure to  $5 \text{ mmol l}^{-1}$   $\text{NH}_4\text{HCO}_3$  (Table 3, Fig. 8), mRNA and protein levels were both upregulated after 48 h of exposure to  $1 \text{ mmol l}^{-1}$   $\text{NH}_4\text{HCO}_3$  (Figs 4 and 8).

#### NKCC1

Mammalian NKCC2 is a kidney-specific isoform with an apical orientation while the NKCC1 isoform is basolaterally located in the membranes of secretory cells (Haas and Forbush, 1998). NKCC1 is thought to be involved in the basolateral uptake of  $\text{NH}_4^+$  in the kidney (Weiner and Hamm, 2006) as well as in colonic crypt cells together with Rh proteins (Worrell et al., 2008), and has also been implicated in ammonia-induced astrocyte swelling in the brain (Jayakumar et al., 2008). In seawater fish gills, NKCC1 is involved in salt secretion and has been detected in the basolateral regions of the MRCs in a number of species (Hwang and Lee, 2007). Although some ammonia may be excreted *via* NKCC in the dogfish shark pup (Evans and More, 1988), the same was not found to be true in the case of toadfish (Evans et al., 1989). Those studies, however, were carried out under low external ammonia conditions. Because NKCC1 is driven by the  $\text{Na}^+$  gradient maintained by NKA, NKCC1 may become important during HEA conditions, when plasma ammonia levels are elevated and NKA is upregulated. Indeed the simultaneous upregulations of *NHE3*, *NKA* and *NKCC1* mRNA levels at 48 h of exposure to  $1 \text{ mmol l}^{-1}$   $\text{NH}_4\text{HCO}_3$  (Fig. 4) and the sustained upregulation of *NKCC1* with exposure to  $5 \text{ mmol l}^{-1}$   $\text{NH}_4\text{HCO}_3$  (Table 3) reinforce the importance of NKCC1 under HEA conditions.

#### Proposed model of ammonia excretion during HEA

Overall, our results are concordant with the original model proposed by Nakada et al. (Nakada et al., 2007). Under control conditions, there is a favourable  $P_{\text{NH}_3}$  gradient for passive ammonia diffusion from blood to water. Some or all of this may be facilitated by Rh proteins with pillar cell Rhag working in cooperation with basolateral Rhbg and apical Rhcg2 in the PVCs to facilitate ammonia efflux out of the gill. Additional support from the MRCs was suggested by Nakada et al. (Nakada et al., 2007) as an auxiliary route of excretion *via* the basolateral  $\text{Na}^+/\text{K}^+$ -ATPase (NKA) and apical Rhcg1. The present data suggest that this route comes into play during HEA. However, we provide evidence for the involvement of additional transporters ( $\text{H}^+$ -ATPase, NKCC1, NHE3) not implicated in the original model. Indeed the presence of NHE3 and NKCC1 in MRCs has been previously demonstrated (Choe et al., 2005; Hirata et al., 2003; Hiroi and McCormick, 2007; Inokuchi et

al., 2008; Inokuchi et al., 2009; Ivanis et al., 2008; Yan et al., 2007), suggesting that the colocalisation of these transporters with Rhcg1 and NKA may serve to regulate ammonia excretion in a coordinated fashion from the MRCs. Additional mechanisms to reduce the entry or back flux of ammonia from the external water (downregulation of Rhag in pillar cells, and Rhbg in PVCs) are also suggested from the present study.

Seawater fish may face a greater challenge during HEA than the freshwater fish. With a more permeable gill, the influx of ammonia during HEA would be greater than that in the freshwater gill (Wilson and Taylor, 1992). Therefore, the first line of defence in the pufferfish when plasma ammonia levels are elevated under HEA conditions may be to try to reduce ammonia entry and/or back flux *via* downregulation of Rhbg in PVCs and Rhag in pillar cells, while switching over to the MRCs, where excretion could be driven by NKA.  $\text{NH}_4^+$  would enter basolaterally *via* NKA and/or NKCC exiting as  $\text{NH}_3$  through the apical Rhcg1 after being deprotonated.  $\text{NH}_3$  would then combine with a  $\text{H}^+$  ion released from NHE3, thus minimising the back flux of  $\text{NH}_3$  through the Rh channels (Fig. 12). This is in contrast to the recently proposed model for freshwater fish (Wright and Wood, 2009) where Rhbg, Rhcg2, NHE2 and  $\text{H}^+$ -ATPase may work in a coordinated manner to facilitate gill ammonia excretion. The pufferfish model also differs slightly from the active ammonia excretion model proposed earlier for the mudskipper (Wilson et al., 2000b), before the discovery of Rh proteins in fish. In the mudskipper model,  $\text{NH}_4^+$  is excreted *via* apical NHEs. Although we cannot exclude the possibility that some  $\text{NH}_4^+$  may leave the gill by this route in the pufferfish, the inclusion of Rhcg1 into the pufferfish model suggests that NHE3 may be more important for  $\text{H}^+$  excretion. While the distribution of pufferfish gill  $\text{H}^+$ -ATPase has not yet been determined and its localisation in the gills of different marine fish species appears to be inconsistent (Evans et al., 2005), in our preliminary working model, we have included it on the apical membrane where it may participate in  $\text{NH}_3$  re-protonation (Fig. 12).

#### Effects of hypercapnia

Because some studies have provided evidence for Rh protein involvement in  $\text{CO}_2$  transport (Endeward et al., 2007; Li et al., 2007; Soupene et al., 2002; Soupene et al., 2004), the possibility of a dual  $\text{NH}_3/\text{CO}_2$  transport function for Rh proteins in fish should not be overlooked. An earlier study on freshwater trout did not reveal any significant changes in gill Rh transcript levels after exposure to 12 h of hypercapnia (Nawata and Wood, 2008). In the present study, 24 h of hypercapnia resulted in a downregulation of *Rhag* mRNA levels in the gill (Table 2), a similar response observed with HEA exposure (Fig. 3). However, unlike HEA, hypercapnia exposure did not raise the plasma ammonia levels and therefore this change must have been in direct response to the high  $\text{CO}_2$ . In fact, at the protein level, all of the Rh proteins (Rhag, Rhbg, Rhcg1 and Rhcg2) in the gill responded to hypercapnia as evidenced by changes in molecular mass when compared with the control (Fig. 7). Additionally, there was a significant decrease in *Rhag* mRNA but not protein levels in the erythrocytes with hypercapnic exposure (Table 2, Fig. 9). It is well known that hypercapnic conditions result in swelling of teleost erythrocytes (e.g. Irving et al., 1941; Nikinmaa, 1992) and, therefore, if indeed Rhag functions as a  $\text{CO}_2$  channel, then downregulation of Rhag would reduce  $\text{CO}_2$  entry thus protecting the erythrocytes from excessive swelling. Together, these observations support a possible role for Rh proteins as dual  $\text{NH}_3/\text{CO}_2$  transporters.

### A role for the skin?

An emerging picture is that the skin may be an auxiliary site of ammonia excretion *via* Rh proteins in fish. In the trout, Rh mRNA levels in the skin increased after branchial excretion was blocked by HEA or Hepes exposure, and after ammonia infusion (Nawata et al., 2007; Nawata and Wood, 2008). In the mangrove killifish, which volatilises ammonia through the skin, Rh mRNA levels were upregulated in the skin after HEA and also aerial exposure (Hung et al., 2007). The most convincing evidence of Rh involvement in skin ammonia excretion, however, was provided by Shih et al. (Shih et al., 2008) in zebrafish larvae and by Wu et al. (Wu et al., 2010) in medaka larvae, both of whom demonstrated, using the scanning ion electrode technique, that Rhcg1 facilitated ammonia excretion across MRC-type cells in the skin. In the present study, exposure of pufferfish to 1 mmol l<sup>-1</sup> NH<sub>4</sub>HCO<sub>3</sub> for 48 h did not result in significant changes of skin Rh mRNA levels (Fig. 5); however, exposure to 5 mmol l<sup>-1</sup> NH<sub>4</sub>HCO<sub>3</sub> resulted in an upregulation of both *Rhbg* and *Rhcg2* mRNA (Table 2). As previously noted in trout exposed to hypercapnia (Nawata and Wood, 2008), no changes of skin Rh mRNA levels were observed in pufferfish exposed to hypercapnia (Table 2). This suggests that Rh mRNA in the skin may be responding to plasma ammonia levels. The significance of Rh proteins in the skin of freshwater and seawater fish would be worthy of future investigation.

### Post-translational modifications of the Rh proteins

This study has revealed that both HEA and high CO<sub>2</sub> exposure resulted in post-translational modifications (PTMs) of the Rh proteins in the membrane protein enriched fraction of the gill as indicated by the molecular mass shifts (Fig. 7). These changes were independent of glycosylation and of relatively large molecular mass, which would exclude PTMs such as phosphorylation or methylation. This suggests conjugation or complexation to other proteins. One possibility, especially in the case of Rhag, may be monoubiquitination (~8 kDa), which acts as an endocytic signal controlling the turnover and downregulation of membrane proteins (Mukhopadhyay and Riezman, 2007; Schnell and Hicke, 2003). Interestingly, although Rhag appeared to undergo modification in the gill after hypercapnia, a similar modification did not occur in the erythrocyte (Figs 7 and 9). In the case of Rhcg1, it may be that under control conditions, the majority of these transporters are in a quiescent state, requiring stimuli such as high ammonia or CO<sub>2</sub> to induce the changes necessary for full functionality. Further studies are required to identify the PTMs and to determine their functional significance in the modulation of gill Rh proteins during HEA and high CO<sub>2</sub> exposure.

### Conclusions

The results of this study provide molecular and physiological evidence to support the model of ammonia excretion proposed earlier for pufferfish. A difference in the handling of high plasma ammonia *via* Rh proteins between freshwater and seawater fish has also been revealed. Under basal conditions, ammonia excretion in the pufferfish probably occurs *via* passive diffusion and/or *via* Rhbg and Rhcg2 in the PVCs, facilitated by a favourable gradient and the high permeability of the gill epithelium. When plasma levels become elevated, however, a more costly active excretion mechanism may be implemented. A switch-over to the MRCs, powered by NKA, with NKCC, NHE3 and Rhcg1 working in cooperation, would be more efficient at lowering plasma ammonia levels and countering the passive influx of ammonia during HEA. The roles of Rhbg in PVCs and Rhag in the pillar cells have also been highlighted as important regulators of ammonia transport to and from the blood.

### LIST OF ABBREVIATIONS

|                         |                                                                  |
|-------------------------|------------------------------------------------------------------|
| HEA                     | high environmental ammonia                                       |
| <i>J</i> <sub>Amm</sub> | ammonia excretion rate                                           |
| MRCs                    | mitochondria-rich cells                                          |
| NHE                     | Na <sup>+</sup> /H <sup>+</sup> exchangers                       |
| NKA                     | Na <sup>+</sup> /K <sup>+</sup> -ATPase                          |
| NKCC1                   | Na <sup>+</sup> /K <sup>+</sup> /2Cl <sup>-</sup> co-transporter |
| PCR                     | polymerase chain reaction                                        |
| PTMs                    | post-translational modifications                                 |
| PVCs                    | pavement cells                                                   |
| qPCR                    | quantitative PCR                                                 |
| Rh                      | Rhesus                                                           |
| <i>T</i> <sub>Amm</sub> | total ammonia                                                    |

### ACKNOWLEDGEMENTS

We thank Katsuhito Tosaya of Numazu Aquaculture Cooperative for the kind provision of pufferfish. This study was supported by the Ministry of Education, Culture, Sport, Science and Technology of Japan (MEXT) Grants-in-Aid for Scientific Research 18059010 and 19770057, the Global Center of Excellence Program of MEXT, as well as an NSERC Discovery Grant and Canada Foundation for Innovation/Ontario Innovation Trust awards to C.M.W., who is supported by the Canada Research Chair Program. C.M.N.'s visit to Japan was supported by a Japan Society for the Promotion of Science Fellowship.

### REFERENCES

- Braun, M. H., Steele, S. L. and Perry, S. F. (2009). The responses of zebrafish (*Danio rerio*) to high external ammonia and urea transporter inhibition: nitrogen excretion and expression of rhesus glycoproteins and urea transporter proteins. *J. Exp. Biol.* **212**, 3846-3856.
- Bruce, L. J. (2008). Red cell membrane transport abnormalities. *Curr. Opin. Hematol.* **15**, 184-190.
- Cameron, J. N. (1986). Responses to reversed NH<sub>3</sub> and NH<sub>4</sub><sup>+</sup> gradients in a teleost (*Ictalurus punctatus*), an elasmobranch (*Raja erinacea*), and a crustacean (*Callinectes sapidus*): Evidence for NH<sub>4</sub><sup>+</sup>/H<sup>+</sup> exchange in the teleost and the elasmobranch. *J. Exp. Zool.* **239**, 183-195.
- Cameron, J. N. and Heisler, N. (1983). Studies of ammonia in the trout: physico-chemical parameters, acid-base behaviour and respiratory clearance. *J. Exp. Biol.* **105**, 107-125.
- Choe, K. P., Kato, A., Hirose, S., Plata, C., Sindic, A., Romero, M. F., Claiborne, J. B. and Evans, D. H. (2005). NHE3 in an ancestral vertebrate: primary sequence, distribution, localization, and function in gills. *Am. J. Physiol.* **289**, R1520-R1534.
- Claiborne, J. B. and Evans, D. H. (1988). Ammonia and acid-base balance during high ammonia exposure in a marine teleost (*Myoxocephalus octodecimspinosus*). *J. Exp. Biol.* **140**, 89-105.
- Claiborne, J. B., Evans, D. H. and Goldstein, L. (1982). Fish branchial Na<sup>+</sup>/NH<sub>4</sub><sup>+</sup> exchange is *via* basolateral Na<sup>+</sup>-K<sup>+</sup>-activated ATPase. *J. Exp. Biol.* **96**, 431-434.
- Claiborne, J., Kratochvilova, H., Diamanduros, A. W., Hall, C., Phillips, M. E., Hirose, S. and Edwards, S. (2008). Expression of branchial Rh glycoprotein ammonia transporters in the marine longhorn sculpin (*Myoxocephalus octodecimspinosus*). *Bull. Mt. Desert Isl. Biol. Lab. Salisb. Cove Maine* **47**, 67-68.
- Edwards, S. L., Wall, B. P., Morrison-Sheltar, A., Sligh, S., Weakley, J. C. and Claiborne, J. B. (2005). The effect of environmental hypercapnia and salinity on the expression of NHE-like isoforms in the gills of a euryhaline fish (*Fundulus heteroclitus*). *J. Exp. Zool.* **303A**, 464-475.
- Endeward, V., Cartron, J.-P., Ripoché, P. and Gros, G. (2007). RhAG protein of the complex is a CO<sub>2</sub> channel in the human red cell membrane. *FASEB J.* **22**, 64-73.
- Evans, D. (1982). Mechanisms of acid extrusion by two marine fishes: the teleost, *Opsanus beta*, and the elasmobranch, *Squalus acanthias*. *J. Exp. Biol.* **97**, 289-299.
- Evans, D. H. (1984). Gill Na<sup>+</sup>/H<sup>+</sup> and Cl<sup>-</sup>/HCO<sub>3</sub><sup>-</sup> exchange systems evolved before the vertebrates entered fresh water. *J. Exp. Biol.* **113**, 465-469.
- Evans, D. H. (2008). Teleost fish osmoregulation: what have we learned since August Krogh, Homer Smith, and Ancel Keys? *Am. J. Physiol.* **295**, R705-R713.
- Evans, D. H. and More, K. J. (1988). Modes of ammonia transport across the gill epithelium of the dogfish pup (*Squalus acanthias*). *J. Exp. Biol.* **138**, 375-397.
- Evans, D. H., Kormanik, G. A. and Krasny, E. K., Jr (1979). Mechanisms of ammonia and acid extrusion by the little skate, *Raja erinacea*. *J. Exp. Zool.* **208**, 431-437.
- Evans, D. H., More, K. J. and Robbins, S. L. (1989). Modes of ammonia transport across the gill epithelium of the marine teleost fish, *Opsanus beta*. *J. Exp. Biol.* **144**, 339-356.
- Evans, D. H., Piermarini, P. M. and Choe, K. P. (2005). The multifunctional fish gill: dominant site of gas exchange, osmoregulation, acid-base regulation, and excretion of nitrogenous waste. *Physiol. Rev.* **85**, 97-177.
- Haas, M. and Forbush, B. (1998). The Na-K-Cl cotransporters. *J. Bioener. Biomem.* **30**, 161-172.
- Hirata, T., Kaneko, T., Ono, T., Nakazato, T., Furukawa, N., Hasegawa, S., Wakabayashi, S., Shigekawa, M., Chang, M. H., Romero, M. F. et al. (2003). Mechanism of acid adaptation of a fish living in a pH 3.5 lake. *Am. J. Physiol.* **284**, R1199-R1212.
- Hiroi, J. and McCormick, S. D. (2007). Variation in salinity tolerance, gill Na<sup>+</sup>/K<sup>+</sup>-ATPase, Na<sup>+</sup>/K<sup>+</sup>/2Cl<sup>-</sup> cotransporter and mitochondria-rich cell distribution in three salmonids *Salvelinus namaycush*, *Salvelinus fontinalis* and *Salmo salar*. *J. Exp. Biol.* **210**, 1015-1024.

- Huang, C. H. and Ye, M. (2010). The Rh protein family: gene evolution, membrane biology, and disease association. *Cell. Mol. Life Sci.* **67**, 1203-1218.
- Hung, C. Y. C., Tsui, K. N. T., Wilson, J. M., Nawata, C. M., Wood, C. M. and Wright, P. A. (2007). Rhesus glycoprotein gene expression in the mangrove killifish *Kryptolebias marmoratus* exposed to elevated environmental ammonia levels and air. *J. Exp. Biol.* **210**, 2419-2429.
- Hwang, P.-P. and Lee, T.-H. (2007). New insights into fish ion regulation and mitochondrion-rich cells. *Comp. Biochem. Physiol.* **148A**, 479-497.
- Inokuchi, M., Hiroi, J., Watanabe, S., Lee, K. M. and Kaneko, T. (2008). Gene expression and morphological localization of NHE3, NCC and NKCC1a in branchial mitochondria-rich cells of Mozambique tilapia (*Oreochromis mossambicus*) acclimated to a wide range of salinities. *Comp. Biochem. Physiol.* **151A**, 151-158.
- Inokuchi, M., Hiroi, J., Watanabe, S., Hwang, P. P. and Kaneko, T. (2009). Morphological and functional classification of ion-absorbing mitochondria-rich cells in the gills of Mozambique tilapia. *J. Exp. Biol.* **212**, 1003-1010.
- Irving, L., Black, E. C. and Safford, V. (1941). The influence of temperature upon the combination of oxygen with the blood of trout. *Biol. Bull.* **30**, 1-17.
- Ivanis, G., Esbaugh, A. J. and Perry, S. F. (2008). Branchial expression and localization of SLC9A2 and SLC9A3 sodium/hydrogen exchangers and their possible role in acid-base regulation in freshwater rainbow trout (*Oncorhynchus mykiss*). *J. Exp. Biol.* **211**, 2467-2477.
- Javelle, A., Lupo, D., Li, X.-D., Merrick, M., Chami, M., Ripoche, P. and Winkler, F. K. (2007). Structural and mechanistic aspects of Amt/Rh proteins. *J. Struct. Biol.* **158**, 472-481.
- Jayakumar, A. R., Liu, M., Moriyama, M., Ramakrishnan, R., Forbush, B., Reddy, P. V. B. and Norenberg, M. D. (2008). Na-K-Cl cotransporter-1 in the mechanism of ammonia-induced astrocyte swelling. *J. Biol. Chem.* **283**, 33874-33882.
- Kinne, R., Kinne-Saffran, E., Schlitz, H. and Scholermann, B. (1986). Ammonium transport in medullary thick ascending limb of rabbit kidney: involvement of the Na<sup>+</sup>,K<sup>+</sup>,Cl<sup>-</sup> cotransporter. *J. Membr. Biol.* **94**, 279-284.
- Kurtz, I. and Balaban, R. S. (1986). Ammonium as a substrate for Na<sup>+</sup>-K<sup>+</sup>-ATPase in rabbit proximal tubules. *Am. J. Physiol.* **250**, F497-F502.
- Li, X., Jayachandran, S., Nguyen, H.-H. T. and Chan, M. (2007). Structure of the *Nitrosomonas europaea* Rh protein. *Proc. Natl. Acad. Sci. USA* **104**, 19279-19284.
- Mallery, C. H. (1983). A carrier enzyme basis for ammonium excretion in teleost gill. NH<sub>4</sub><sup>+</sup>-stimulated Na-dependent ATPase activity in *Opsanus beta*. *Comp. Biochem. Physiol.* **74A**, 889-897.
- Marini, A.-M., Urrestarazu, A., Beauwens, R. and André, B. (1997). The Rh (Rhesus) blood group polypeptides are related to NH<sub>4</sub><sup>+</sup> transporters. *Trends Biochem. Sci.* **22**, 460-461.
- Marini, A.-M., Matassi, G., Raynal, V., André, B., Cartron, J.-P. and Chérif-Zahar, B. (2000). The human Rhesus-associated RhAG protein and a kidney homologue promote ammonium transport in yeast. *Nat. Genet.* **26**, 341-344.
- Mayer, M., Schaaf, G., Mouro, I., Lopez, C., Colin, Y., Neumann, P., Cartron, J.-P. and Ludewig, U. (2006). Different transport mechanisms in plant and human AMT/Rh-type ammonium transporters. *J. Gen. Physiol.* **127**, 133-144.
- McCormick, S. D. (1993). Methods for the nonlethal gill biopsy and measurements of Na<sup>+</sup>, K<sup>+</sup>-ATPase activity. *Can. J. Fish. Aquat. Sci.* **50**, 656-658.
- Mistry, A. C., Honda, S., Hirata, T., Kato, A. and Hirose, S. (2001). Eel urea transporter is localized to chloride cells and is salinity dependent. *Am. J. Physiol.* **281**, R1594-R1604.
- Mommsen, T. P. and Walsh, P. J. (1992). Biochemical and environmental perspectives nitrogen metabolism in fishes. *Experientia* **48**, 583-593.
- Mouro-Chanteloup, I., Cochet, S., Chami, M., Genetet, S., Zidi-Yahiaoui, N., Engel, A., Colin, Y., Bertrand, O. and Ripoche, P. (2010). Functional reconstitution into liposomes of purified human RhCG ammonia channel. *PLoS ONE* **5**, e8921.
- Mukhopadhyay, D. and Riezman, H. (2007). Proteasome-independent functions of ubiquitin in endocytosis and signaling. *Science* **315**, 201-205.
- Nakada, T., Westhoff, C. M., Kato, A. and Hirose, S. (2007). Ammonia secretion from fish gill depends on a set of Rh glycoproteins. *FASEB J.* **21**, 1067-1074.
- Nawata, C. M. and Wood, C. M. (2008). The effects of CO<sub>2</sub> and external buffering on ammonia excretion and Rhesus glycoprotein mRNA expression in rainbow trout. *J. Exp. Biol.* **211**, 3226-3236.
- Nawata, C. M. and Wood, C. M. (2009). mRNA analysis of the physiological responses to ammonia infusion in rainbow trout. *J. Comp. Physiol.* **199B**, 799-810.
- Nawata, C. M., Hung, C. C. Y., Tsui, T. K. N., Wilson, J. M., Wright, P. A. and Wood, C. M. (2007). Ammonia excretion in rainbow trout (*Oncorhynchus mykiss*): evidence for Rh glycoprotein and H<sup>+</sup>-ATPase involvement. *Physiol. Genomics* **31**, 463-474.
- Nawata, C. M., Wood, C. M. and O'Donnell, M. J. (2010). Functional characterization of Rhesus glycoproteins from an ammoniotelic teleost, the rainbow trout, using oocyte expression and SIET analysis. *J. Exp. Biol.* **213**, 1049-1059.
- Nikinmaa, M. (1992). Membrane transport and control of hemoglobin-oxygen affinity in nucleated erythrocytes. *Physiol. Rev.* **72**, 301-321.
- Perry, S. F. and Fryer, J. N. (1997). Proton pumps in the fish gill and kidney. *Fish Physiol. Biochem.* **17**, 363-369.
- Randall, D. J., Wilson, J. M., Peng, K. W., Kwok, T. W. K., Kuah, S. S. L., Chew, S. F., Lam, T. J. and Ip, Y. K. (1999). The mudskipper, *Periophthalmodon schlosseri*, actively transports NH<sub>4</sub><sup>+</sup> against a concentration gradient. *Am. J. Physiol.* **277**, R1562-R1567.
- Schnell, J. D. and Hicke, L. (2003). Non-traditional functions of ubiquitin and ubiquitin-binding proteins. *J. Biol. Chem.* **278**, 35857-35860.
- Shih, T.-H., Horng, J.-L., Hwang, P.-P. and Lin, L.-Y. (2008). Ammonia excretion by the skin of zebrafish (*Danio rerio*) larvae. *Am. J. Physiol.* **295**, C1625-C1632.
- Soupeine, E., King, N., Field, E., Liu, P., Niyogi, K. K., Huang, C.-H. and Kustu, S. (2002). Rhesus expression in a green alga is regulated by CO<sub>2</sub>. *Proc. Natl. Acad. Sci. USA* **99**, 7769-7773.
- Soupeine, E., Inwood, W. and Kustu, S. (2004). Lack of the Rhesus protein Rh1 impairs growth of the green alga *Chlamydomonas reinhardtii* at high CO<sub>2</sub>. *Proc. Natl. Acad. Sci. USA* **101**, 7787-7792.
- Towle, D. W. and Holleland, T. (1987). Ammonium ion substitutes for K<sup>+</sup> in ATP-dependent Na<sup>+</sup> transport by basolateral membrane vesicles. *Am. J. Physiol.* **252**, R479-R489.
- Tsui, T. K. N., Hung, C. Y. C., Nawata, C. M., Wilson, J. M., Wright, P. A. and Wood, C. M. (2009). Ammonia transport in cultured gill epithelium of freshwater rainbow trout: the importance of Rhesus glycoproteins and the presence of an apical Na<sup>+</sup>/NH<sub>4</sub><sup>+</sup> exchange complex. *J. Exp. Biol.* **212**, 878-892.
- Vandesompele, J., De Preter, K., Pattyn, F., Poppe, B., Van Roy, N., De Paep, A. and Speleman, F. (2002). Accurate normalization of real-time quantitative RT-PCR data by geometric averaging of multiple internal control genes. *Genome Biol.* **3**, RESEARCH0034.
- Verdouw, H., van Echteld, C. J. A. and Dekkers, E. M. J. (1978). Ammonia determinations based on indophenol formation with sodium salicylate. *Water Res.* **12**, 399-402.
- Wall, S. M. and Koger, L. M. (1994). NH<sub>4</sub><sup>+</sup> transport mediated by Na<sup>+</sup>-K<sup>+</sup>-ATPase in rat inner medullary collecting duct. *Am. J. Physiol.* **267**, F660-F670.
- Wall, S. M., Trinh, H. N. and Woodward, K. E. (1995). Heterogeneity of NH<sub>4</sub><sup>+</sup> transport in mouse inner medullary collecting duct cells. *Am. J. Physiol.* **269**, F536-F544.
- Walsh, P. J. (1998). Nitrogen excretion and metabolism. In *The Physiology of Fishes* (ed. D. H. Evans), pp. 199-214. Boca Raton: CRC Press.
- Weidinger, K., Neuhauser, B., Gilch, S., Ludewig, U., Meyer, O. and Schmidt, I. (2007). Functional and physiological evidence for a Rhesus-type ammonia transporter in *Nitrosomonas europaea*. *FEMS Microbiol. Lett.* **273**, 260-267.
- Weihrauch, D., Becker, W., Postel, U., Luck-Kopp, S. and Siebers, D. (1999). Potential of active excretion of ammonia in three different haline species of crabs. *J. Comp. Physiol. B Biochem. Syst. Environ. Physiol.* **169**, 25-37.
- Weihrauch, D., Ziegler, A., Siebers, D. and Towle, D. W. (2002). Active ammonia excretion across the gills of the green shore crab *Carcinus maenas*: participation of Na<sup>+</sup>/K<sup>+</sup>-ATPase, V-type H<sup>+</sup>-ATPase and functional microtubules. *J. Exp. Biol.* **205**, 2765-2775.
- Weihrauch, D., Wilkie, M. P. and Walsh, P. J. (2009). Ammonia and urea transporters in gill of fish and aquatic crustaceans. *J. Exp. Biol.* **212**, 1716-1730.
- Weiner, I. D. and Hamm, L. L. (2006). Molecular mechanisms of renal ammonia transport. *Annu. Rev. Physiol.* **69**, 317-340.
- Westhoff, C. M., Siegel, D. L., Burd, C. G. and Foskett, J. K. (2004). Mechanism of genetic complementation of ammonium transport in yeast by human erythrocyte Rh-associated glycoprotein. *J. Biol. Chem.* **279**, 17443-17448.
- Wilkie, M. P. (2002). Ammonia excretion and urea handling by fish gills: present understanding and future research challenges. *J. Exp. Zool.* **293**, 284-301.
- Wilson, J. M., Laurent, P., Tufts, B., Benos, D. J., Donowitz, M., Vogl, A. W. and Randall, D. J. (2000a). NaCl uptake by the branchial epithelium in freshwater teleost fish: an immunological approach to ion-transport protein localization. *J. Exp. Biol.* **203**, 2279-2296.
- Wilson, J. M., Randall, D. J., Donowitz, M., Vogl, A. W. and Ip, A. K.-Y. (2000b). Immunolocalization of ion-transport proteins to branchial epithelium mitochondria-rich cells in the mudskipper (*Periophthalmodon schlosseri*). *J. Exp. Biol.* **203**, 2297-2310.
- Wilson, R. W. and Taylor, E. W. (1992). Transbranchial ammonia gradients and acid-base responses to high external ammonia concentration in rainbow trout (*Oncorhynchus mykiss*) acclimated to different salinities. *J. Exp. Biol.* **166**, 95-112.
- Wilson, R. W., Wright, P. M., Munger, S. and Wood, C. M. (1994). Ammonia excretion in fresh water rainbow trout (*Oncorhynchus mykiss*) and the importance of gill boundary layer acidification: lack of evidence for Na<sup>+</sup>/NH<sub>4</sub><sup>+</sup> exchange. *J. Exp. Biol.* **191**, 37-58.
- Wood, C. M. (1993). Ammonia and urea metabolism and excretion. In *The Physiology of Fishes* (ed. D. H. Evans), pp. 379-425. Boca Raton: CRC Press.
- Worrell, R. T., Merk, L. and Matthews, J. B. (2008). Ammonium transport in the colonic crypt cell line, T84: role for Rhesus glycoproteins and NKCC1. *Am. J. Physiol.* **294**, G429-G440.
- Wright, P. A. and Wood, C. M. (2009). A new paradigm for ammonia excretion in aquatic animals: role of Rhesus (Rh) glycoproteins. *J. Exp. Biol.* **212**, 2302-2312.
- Wu, S. C., Horng, J. L., Liu, S. T., Hwang, P. P., Wen, Z. H., Lin, C. S. and Lin, L. Y. (2010). Ammonium-dependent sodium uptake in mitochondrion-rich cells of medaka (*Oryzias latipes*) larvae. *Am. J. Physiol.* **298**, C237-C250.
- Yan, J.-J., Chou, M.-Y., Kaneko, T. and Hwang, P.-P. (2007). Gene expression of Na<sup>+</sup>/H<sup>+</sup> exchanger in zebrafish H<sup>+</sup>-ATPase-rich cells during acclimation to low-Na<sup>+</sup> and acidic environments. *Am. J. Physiol.* **293**, C1814-C1823.
- Zimmer, A. M., Nawata, C. M. and Wood, C. M. (2010). Physiological and molecular analysis of the interactive effects of feeding and high environmental ammonia on branchial ammonia excretion and Na<sup>+</sup> uptake in freshwater rainbow trout. *J. Comp. Physiol. B. doi: 10.1007/s00360-010-04884*.
